# Supplementary material
Source: bioRxiv or medRxiv preprint supplement (https://www.biorxiv.org/highwire/filestream/6027/field_highwire_adjunct_files/11/022889-8.pdf)

a

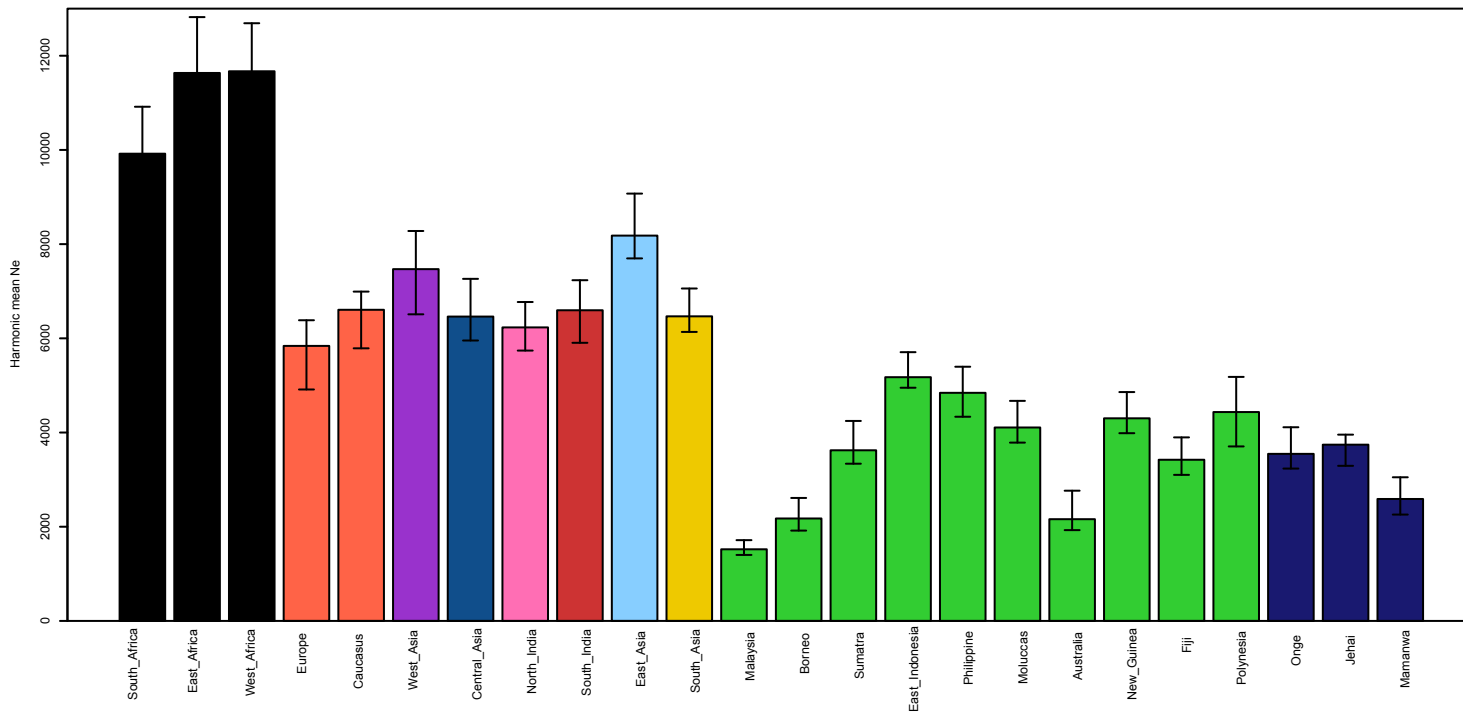

b

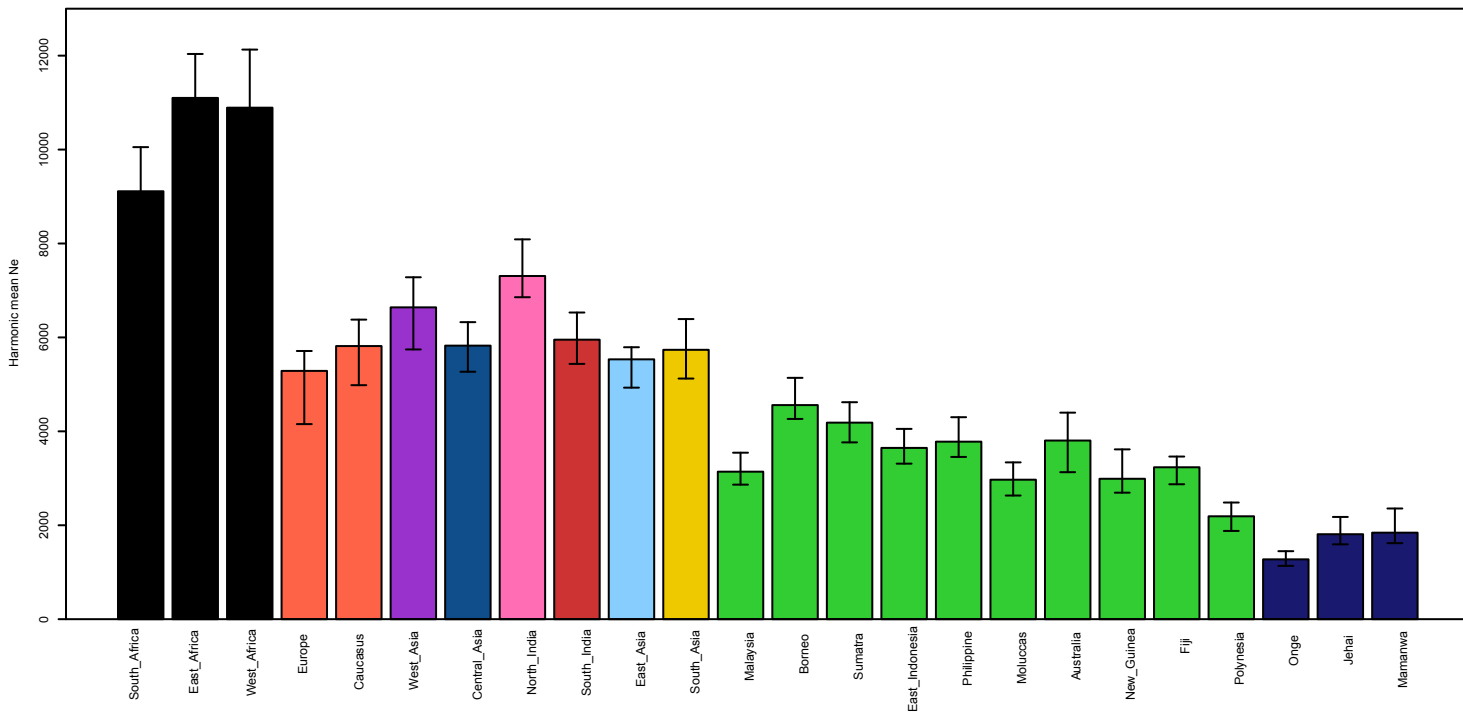

Supplement: Supplementary file [file 022889-8.pdf]
